# Supplementary material for: A series of high-energy coordination polymers with 3,6-bis(4-nitroamino-1,2,5-oxadiazol-3-yl)-1,4,2,5-dioxadiazine, a ligand with multi-coordination sites, high oxygen content and detonation performance: syntheses, structures, and performance
Source: Royal Society of Chemistry journal article supplement (doi:10.1039/c7ta05479c), 2017-01-01
Supplement: c7ta05479c1.pdf [file c7ta05479c1.pdf]

Supporting Information

for

A series of high-energy coordination polymers with 3,6-bis(4-nitroamino-1,2,5-oxadiazol-3-yl)-1,4,2,5-dioxadiazine, a ligand with multi- coordination sites, high oxygen content and detonation performance: Syntheses, structures, and performance

*Cheng Shen, Yuan-gang Xu and Ming Lu \**

*(School of Chemical Engineering, Nanjing University of Science and Technology, Nanjing 210094,*

*China)*

**Contents**

S2 Single crystal data for compound 1

S3 Single crystal data for compound 1a

S4 Single crystal data for compound 2

S5 Single crystal data for compound 3

S9 Detonation property values comparison

S10 REFERENCES

---

\* Corresponding author, E-mail: luming@mail.njust.edu.cn

Table 1. Bond lengths [Å] and angles [°] for compound (1)

|           |          |                 |            |
|-----------|----------|-----------------|------------|
| Ag1 - N2  | 2.265(3) | N2 - Ag1 - O1   | 144.80(9)  |
| Ag1 - O1  | 2.277(2) | N2 - Ag1 - N1   | 75.22(9)   |
| Ag1 - N1  | 2.577(3) | N2 - Ag1 - N4   | 128.62(9)  |
| Ag1 - N4  | 2.404(3) | O1 - Ag1 - N1   | 100.59(9)  |
| O3 - N3   | 1.246(4) | O1 - Ag1 - N4   | 86.10(9)   |
| N3 - N2   | 1.349(4) | N4 - Ag1 - N1   | 109.64(10) |
| N3 - O2   | 1.246(4) | O3 - N3 - N2    | 122.0(3)   |
| N2 - C1   | 1.371(4) | O3 - N3 - O2    | 122.9(3)   |
| O4 - N5   | 1.367(4) | O2 - N3 - N2    | 115.1(3)   |
| O4 - N4   | 1.408(3) | N3 - N2 - Ag1   | 109.16(18) |
| N006 - C4 | 1.314(5) | N3 - N2 - C1    | 117.5(3)   |
| N006 - C5 | 1.450(5) | C1 - N2 - Ag1   | 128.9(2)   |
| N006 - C6 | 1.457(5) | N5 - O4 - N4    | 110.8(2)   |
| O1 - C4   | 1.255(4) | C4 - N006 - C5  | 121.9(3)   |
| C1 - C2   | 1.440(4) | C4 - N006 - C6  | 121.0(3)   |
| C1 - N4   | 1.317(4) | C5 - N006 - C6  | 117.1(3)   |
| C2 - N5   | 1.291(4) | C4 - O1 - Ag1   | 124.3(2)   |
| C2 - C3   | 1.465(5) | N2 - C1 - C2    | 122.3(3)   |
| C3 - N1   | 1.272(4) | N4 - C1 - N2    | 130.1(3)   |
| C3 - O5   | 1.337(4) | N4 - C1 - C2    | 107.5(3)   |
| N1 - O5   | 1.425(4) | C1 - C2 - C3    | 130.6(3)   |
| N4 - Ag1  | 2.404(3) | N5 - C2 - C1    | 110.3(3)   |
| O5 - N1   | 1.425(4) | N5 - C2 - C3    | 119.1(3)   |
| C4 - H4   | 0.95     | C2 - N5 - O4    | 106.0(3)   |
| C5 - H5A  | 0.98     | N1 - C3 - C2    | 121.1(3)   |
| C5 - H5B  | 0.98     | N1 - C3 - O5    | 126.8(3)   |
| C5 - H5C  | 0.98     | O5 - C3 - C2    | 112.0(3)   |
| C6 - H6A  | 0.98     | C3 - N1 - Ag1   | 125.0(2)   |
| C6 - H6B  | 0.98     | C3 - N1 - O5    | 115.3(3)   |
| C6 - H6C  | 0.98     | O5 - N1 - Ag1   | 114.58(19) |
|           |          | O4 - N4 - Ag1   | 115.39(18) |
|           |          | C1 - N4 - Ag1   | 126.3(2)   |
|           |          | C1 - N4 - O4    | 105.4(3)   |
|           |          | C3 - O5 - N1    | 117.9(3)   |
|           |          | N006 - C4 - H4  | 118.1      |
|           |          | O1 - C4 - N006  | 123.7(3)   |
|           |          | O1 - C4 - H4    | 118.1      |
|           |          | N006 - C5 - H5A | 109.5      |
|           |          | N006 - C5 - H5B | 109.5      |
|           |          | N006 - C5 - H5C | 109.5      |

|                 |       |
|-----------------|-------|
| H5A - C5 - H5B  | 109.5 |
| H5A - C5 - H5C  | 109.5 |
| H5B - C5 - H5C  | 109.5 |
| N006 - C6 - H6A | 109.5 |
| N006 - C6 - H6B | 109.5 |
| N006 - C6 - H6C | 109.5 |
| H6A - C6 - H6B  | 109.5 |
| H6A - C6 - H6C  | 109.5 |
| H6B - C6 - H6C  | 109.5 |

Table 2. Bond lengths [ $\text{\AA}$ ] and angles [ $^\circ$ ] for compound (1a)

|          |           |                |            |
|----------|-----------|----------------|------------|
| Ag1 - N4 | 2.251(5)  | N4 - Ag1 - N2  | 167.15(17) |
| Ag1 - N2 | 2.253(5)  | N4 - Ag1 - O3  | 112.70(16) |
| Ag1 - O3 | 2.582(5)  | N2 - Ag1 - O3  | 64.12(16)  |
| Ag1 - N1 | 2.618(5)  | N4 - Ag1 - N1  | 76.36(16)  |
| C1 - N1  | 1.256(7)  | N2 - Ag1 - N1  | 90.95(17)  |
| C1 - O1' | 1.378(15) | O3 - Ag1 - N1  | 88.01(15)  |
| C1 - O1  | 1.397(14) | N1 - C1 - O1'  | 125.6(8)   |
| C1 - C3  | 1.479(8)  | N1 - C1 - O1   | 126.5(7)   |
| C2 - N2  | 1.309(7)  | N1 - C1 - C3   | 121.2(6)   |
| C2 - N4  | 1.377(7)  | O1' - C1 - C3  | 111.3(7)   |
| C2 - C3  | 1.441(8)  | O1 - C1 - C3   | 110.1(7)   |
| C3 - N3  | 1.297(7)  | N2 - C2 - N4   | 130.2(6)   |
| N1 - O1  | 1.453(12) | N2 - C2 - C3   | 107.7(5)   |
| N1 - O1' | 1.466(15) | N4 - C2 - C3   | 122.1(6)   |
| N1 - Ag1 | 2.618(5)  | N3 - C3 - C2   | 109.8(5)   |
| N2 - O2  | 1.393(6)  | N3 - C3 - C1   | 118.1(6)   |
| N3 - O2  | 1.363(6)  | C2 - C3 - C1   | 132.1(6)   |
| N4 - N5  | 1.361(7)  | C1 - N1 - O1   | 115.0(6)   |
| N4 - Ag1 | 2.251(5)  | C1 - N1 - O1'  | 113.6(7)   |
| N5 - O3  | 1.238(6)  | C1 - N1 - Ag1  | 127.3(4)   |
| N5 - O4  | 1.241(6)  | O1 - N1 - Ag1  | 111.1(6)   |
| O1 - C1  | 1.397(14) | O1' - N1 - Ag1 | 119.1(6)   |
| O1' - C1 | 1.378(15) | C2 - N2 - O2   | 105.5(5)   |
|          |           | C2 - N2 - Ag1  | 132.3(4)   |
|          |           | O2 - N2 - Ag1  | 115.5(3)   |
|          |           | C3 - N3 - O2   | 105.6(5)   |
|          |           | N5 - N4 - C2   | 117.7(5)   |
|          |           | N5 - N4 - Ag1  | 108.1(4)   |
|          |           | C2 - N4 - Ag1  | 133.0(4)   |
|          |           | O3 - N5 - O4   | 123.1(5)   |

|               |           |
|---------------|-----------|
| O3 - N5 - N4  | 122.0(5)  |
| O4 - N5 - N4  | 114.8(5)  |
| N3 - O2 - N2  | 111.5(4)  |
| N5 - O3 - Ag1 | 127.4(4)  |
| C1 - O1 - N1  | 112.1(10) |
| C1 - O1' - N1 | 112.4(11) |

Table 3. Bond lengths [Å] and angles [°] for compound (2)

|             |            |                  |            |
|-------------|------------|------------------|------------|
| Cu1 - O5    | 1.9780(14) | O5 - Cu1 - O5    | 180.00(9)  |
| Cu1 - O5    | 1.9780(14) | O5 - Cu1 - O1    | 95.01(6)   |
| Cu1 - O6    | 1.9266(14) | O5 - Cu1 - O1    | 84.99(6)   |
| Cu1 - O6    | 1.9265(14) | O5 - Cu1 - O1    | 95.01(6)   |
| Cu1 - O1    | 2.3893(15) | O5 - Cu1 - O1    | 84.99(6)   |
| Cu1 - O1    | 2.3893(15) | O6 - Cu1 - O5    | 88.11(6)   |
| O5 - H5A    | 0.8586     | O6 - Cu1 - O5    | 91.89(6)   |
| O5 - H5B    | 0.88(2)    | O6 - Cu1 - O5    | 91.89(6)   |
| O6 - H6A    | 0.8666     | O6 - Cu1 - O5    | 88.11(6)   |
| O6 - H6B    | 0.8662     | O6 - Cu1 - O6    | 180        |
| O1 - N1     | 1.263(2)   | O6 - Cu1 - O1    | 90.36(6)   |
| O2 - N1     | 1.229(2)   | O6 - Cu1 - O1    | 89.64(6)   |
| O7 - H7A    | 0.835(16)  | O6 - Cu1 - O1    | 90.36(6)   |
| O7 - H7B    | 0.830(17)  | O6 - Cu1 - O1    | 89.64(6)   |
| O3 - N4     | 1.358(2)   | O1 - Cu1 - O1    | 180.00(6)  |
| O3 - N3     | 1.398(2)   | Cu1 - O5 - H5A   | 109.9      |
| O4 - N5     | 1.422(2)   | Cu1 - O5 - H5B   | 125(2)     |
| O4 - C00G   | 1.336(2)   | H5A - O5 - H5B   | 110.7      |
| N1 - N2     | 1.318(2)   | Cu1 - O6 - H6A   | 110.7      |
| N5 - O4     | 1.422(2)   | Cu1 - O6 - H6B   | 110.3      |
| N5 - C00G   | 1.266(2)   | H6A - O6 - H6B   | 108.2      |
| N2 - C00F   | 1.374(2)   | N1 - O1 - Cu1    | 125.12(12) |
| N4 - C00E   | 1.302(3)   | H7A - O7 - H7B   | 120(3)     |
| N3 - C00F   | 1.310(3)   | N4 - O3 - N3     | 111.39(15) |
| C00E - C00F | 1.438(2)   | C00G - O4 - N5   | 117.74(15) |
| C00E - C00G | 1.450(3)   | O1 - N1 - N2     | 115.56(16) |
|             |            | O2 - N1 - O1     | 119.95(16) |
|             |            | O2 - N1 - N2     | 124.43(17) |
|             |            | C00G - N5 - O4   | 115.09(16) |
|             |            | N1 - N2 - C00F   | 116.21(16) |
|             |            | C00E - N4 - O3   | 105.68(16) |
|             |            | C00F - N3 - O3   | 105.45(16) |
|             |            | N4 - C00E - C00F | 109.75(17) |

|                    |            |
|--------------------|------------|
| N4 - C00E - C00G   | 120.22(17) |
| C00F - C00E - C00G | 130.03(17) |
| N2 - C00F - C00E   | 120.59(17) |
| N3 - C00F - N2     | 131.67(18) |
| N3 - C00F - C00E   | 107.73(17) |
| O4 - C00G - C00E   | 112.34(16) |
| N5 - C00G - O4     | 127.17(18) |
| N5 - C00G - C00E   | 120.48(17) |

Table 4. Bond lengths [Å] and angles [°] for compound (3)

|            |           |                 |          |
|------------|-----------|-----------------|----------|
| Co1 - O1W  | 2.158(6)  | O1W - Co1 - N1  | 92.7(3)  |
| Co1 - O2W  | 2.055(6)  | O1W - Co1 - N2  | 85.6(3)  |
| Co1 - O3W  | 2.091(6)  | O2W - Co1 - O1W | 93.8(3)  |
| Co1 - O4W  | 2.147(6)  | O2W - Co1 - O3W | 83.5(3)  |
| Co1 - N1   | 2.171(6)  | O2W - Co1 - O4W | 92.2(3)  |
| Co1 - N2   | 2.185(7)  | O2W - Co1 - N1  | 101.2(3) |
| Co2 - O5W  | 2.095(6)  | O2W - Co1 - N2  | 176.4(3) |
| Co2 - O6W  | 2.070(6)  | O3W - Co1 - O1W | 89.3(3)  |
| Co2 - O7W  | 2.091(6)  | O3W - Co1 - O4W | 88.7(3)  |
| Co2 - O9W  | 2.071(5)  | O3W - Co1 - N1  | 174.7(3) |
| Co2 - N11  | 2.147(6)  | O3W - Co1 - N2  | 92.9(3)  |
| Co2 - N12  | 2.151(7)  | O4W - Co1 - O1W | 173.5(3) |
| O1 - N3    | 1.238(8)  | O4W - Co1 - N1  | 88.7(3)  |
| O1W - H1WA | 0.8798    | O4W - Co1 - N2  | 88.3(3)  |
| O1W - H1WB | 0.8796    | N1 - Co1 - N2   | 82.4(3)  |
| O2W - H2WA | 0.9177    | O5W - Co2 - N11 | 87.9(2)  |
| O2W - H2WB | 0.9217    | O5W - Co2 - N12 | 87.5(2)  |
| O2 - N3    | 1.230(8)  | O6W - Co2 - O5W | 90.6(2)  |
| O3W - H3WA | 0.9172    | O6W - Co2 - O7W | 91.4(2)  |
| O3W - H3WB | 0.915     | O6W - Co2 - O9W | 86.1(2)  |
| O3 - N4    | 1.414(9)  | O6W - Co2 - N11 | 99.7(2)  |
| O3 - N5    | 1.355(8)  | O6W - Co2 - N12 | 175.5(3) |
| O4W - H4WA | 0.872     | O7W - Co2 - O5W | 176.6(2) |
| O4W - H4WB | 0.8717    | O7W - Co2 - N11 | 94.5(2)  |
| O4 - N6    | 1.442(8)  | O7W - Co2 - N12 | 90.3(2)  |
| O4 - C01F  | 1.340(10) | O9W - Co2 - O5W | 92.1(2)  |
| O5 - N2    | 1.429(8)  | O9W - Co2 - O7W | 85.4(3)  |
| O5 - C01G  | 1.358(10) | O9W - Co2 - N11 | 174.2(3) |
| O5W - H5WA | 0.8745    | O9W - Co2 - N12 | 89.9(2)  |

---

|             |           |                    |          |
|-------------|-----------|--------------------|----------|
| O5W - H5WB  | 0.8739    | N11 - Co2 - N12    | 84.3(2)  |
| O6W - H6WA  | 0.8976    | Co1 - O1W - H1WA   | 110      |
| O6W - H6WB  | 0.8976    | Co1 - O1W - H1WB   | 109.8    |
| O6 - N7     | 1.366(8)  | H1WA - O1W - H1WB  | 108.9    |
| O6 - N8     | 1.413(9)  | Co1 - O2W - H2WA   | 111.5    |
| O7 - N10    | 1.229(9)  | Co1 - O2W - H2WB   | 113      |
| O7W - H7WA  | 0.912     | H2WA - O2W - H2WB  | 105.8    |
| O7W - H7WB  | 0.9117    | Co1 - O3W - H3WA   | 112.6    |
| O8 - N10    | 1.286(9)  | Co1 - O3W - H3WB   | 111.3    |
| O9 - N20    | 1.259(10) | H3WA - O3W - H3WB  | 106.2    |
| O9W - H9WA  | 0.9033    | N5 - O3 - N4       | 112.1(5) |
| O9W - H9WB  | 0.9028    | Co1 - O4W - H4WA   | 109.5    |
| O10 - N20   | 1.244(10) | Co1 - O4W - H4WB   | 109.1    |
| O11W - H11A | 0.8699    | H4WA - O4W - H4WB  | 109.3    |
| O11W - H11B | 0.8701    | C01F - O4 - N6     | 114.3(6) |
| O11 - N17   | 1.372(9)  | C01G - O5 - N2     | 112.9(6) |
| O11 - N18   | 1.393(10) | Co2 - O5W - H5WA   | 109.7    |
| O12 - N12   | 1.448(8)  | Co2 - O5W - H5WB   | 109.3    |
| O12 - C01P  | 1.370(11) | H5WA - O5W - H5WB  | 109.2    |
| O13 - N16   | 1.464(9)  | Co2 - O6W - H6WA   | 110.9    |
| O13 - C01L  | 1.337(9)  | Co2 - O6W - H6WB   | 111      |
| O14 - N14   | 1.417(8)  | H6WA - O6W - H6WB  | 107.7    |
| O14 - N15   | 1.357(8)  | N7 - O6 - N8       | 110.8(5) |
| O15 - N13   | 1.224(8)  | Co2 - O7W - H7WA   | 112.2    |
| O16 - N13   | 1.240(8)  | Co2 - O7W - H7WB   | 111.8    |
| N1 - N3     | 1.349(9)  | H7WA - O7W - H7WB  | 106.8    |
| N1 - C01K   | 1.380(10) | Co2 - O9W - H9WA   | 111.7    |
| N2 - C01F   | 1.271(10) | Co2 - O9W - H9WB   | 111.4    |
| N4 - C01K   | 1.325(10) | H9WA - O9W - H9WB  | 107.3    |
| N5 - C01M   | 1.306(10) | H11A - O11W - H11B | 109.5    |
| N6 - C01G   | 1.277(10) | N17 - O11 - N18    | 112.2(6) |
| N7 - C01E   | 1.294(10) | C01P - O12 - N12   | 111.9(6) |
| N8 - C01J   | 1.295(9)  | C01L - O13 - N16   | 112.8(6) |
| N9 - N10    | 1.315(9)  | N15 - O14 - N14    | 110.8(5) |
| N9 - C01J   | 1.387(10) | N3 - N1 - Co1      | 120.0(5) |
| N11 - N13   | 1.346(9)  | N3 - N1 - C01K     | 116.3(6) |
| N11 - C01I  | 1.372(10) | C01K - N1 - Co1    | 119.8(5) |
| N12 - C01L  | 1.277(10) | O5 - N2 - Co1      | 118.1(4) |
| N14 - C01I  | 1.307(10) | C01F - N2 - Co1    | 127.7(6) |
| N15 - C01N  | 1.307(10) | C01F - N2 - O5     | 113.3(7) |
| N16 - C01P  | 1.252(10) | O1 - N3 - N1       | 115.4(6) |
| N17 - C01O  | 1.330(11) | O2 - N3 - O1       | 121.8(7) |
| N18 - C01Q  | 1.334(11) | O2 - N3 - N1       | 122.8(6) |
| N19 - N20   | 1.329(10) | C01K - N4 - O3     | 103.8(6) |

---

---

|             |           |                    |          |
|-------------|-----------|--------------------|----------|
| N19 - C01Q  | 1.365(11) | C01M - N5 - O3     | 104.8(6) |
| C01Q - C01O | 1.419(12) | C01G - N6 - O4     | 111.8(7) |
| C01N - C01L | 1.458(10) | C01E - N7 - O6     | 105.8(6) |
| C01N - C01I | 1.445(11) | C01J - N8 - O6     | 104.9(6) |
| C01E - C01G | 1.452(11) | N10 - N9 - C01J    | 115.5(7) |
| C01E - C01J | 1.435(11) | O7 - N10 - O8      | 120.6(7) |
| C01P - C01O | 1.470(11) | O7 - N10 - N9      | 125.0(7) |
| C01F - C01M | 1.455(11) | O8 - N10 - N9      | 114.2(7) |
| C01M - C01K | 1.414(11) | N13 - N11 - Co2    | 121.0(5) |
| O10W - H10A | 0.8701    | N13 - N11 - C01I   | 116.2(6) |
| O10W - H10B | 0.87      | C01I - N11 - Co2   | 120.5(5) |
| O12W - H12A | 0.87      | O12 - N12 - Co2    | 119.2(4) |
| O12W - H12B | 0.8698    | C01L - N12 - Co2   | 128.9(5) |
| O8W - H8WA  | 0.87      | C01L - N12 - O12   | 111.8(6) |
| O8W - H8WB  | 0.87      | O15 - N13 - O16    | 122.6(7) |
|             |           | O15 - N13 - N11    | 122.1(6) |
|             |           | O16 - N13 - N11    | 115.3(6) |
|             |           | C01I - N14 - O14   | 105.7(6) |
|             |           | C01N - N15 - O14   | 106.1(6) |
|             |           | C01P - N16 - O13   | 111.5(7) |
|             |           | C01O - N17 - O11   | 104.2(7) |
|             |           | C01Q - N18 - O11   | 105.2(7) |
|             |           | N20 - N19 - C01Q   | 115.2(7) |
|             |           | O9 - N20 - N19     | 115.9(7) |
|             |           | O10 - N20 - O9     | 119.1(8) |
|             |           | O10 - N20 - N19    | 124.9(7) |
|             |           | N18 - C01Q - N19   | 132.2(8) |
|             |           | N18 - C01Q - C01O  | 107.7(7) |
|             |           | N19 - C01Q - C01O  | 120.1(8) |
|             |           | N15 - C01N - C01L  | 120.7(7) |
|             |           | N15 - C01N - C01I  | 109.7(7) |
|             |           | C01I - C01N - C01L | 129.2(7) |
|             |           | O13 - C01L - C01N  | 114.5(6) |
|             |           | N12 - C01L - O13   | 126.7(7) |
|             |           | N12 - C01L - C01N  | 118.6(7) |
|             |           | N7 - C01E - C01G   | 119.6(7) |
|             |           | N7 - C01E - C01J   | 109.6(7) |
|             |           | C01J - C01E - C01G | 130.7(7) |
|             |           | O12 - C01P - C01O  | 112.6(7) |
|             |           | N16 - C01P - O12   | 127.0(8) |
|             |           | N16 - C01P - C01O  | 120.4(8) |
|             |           | O4 - C01F - C01M   | 116.1(7) |
|             |           | N2 - C01F - O4     | 124.2(7) |
|             |           | N2 - C01F - C01M   | 119.7(8) |

---

---

|                    |          |
|--------------------|----------|
| N5 - C01M - C01F   | 119.7(7) |
| N5 - C01M - C01K   | 110.9(7) |
| C01K - C01M - C01F | 129.3(7) |
| O5 - C01G - C01E   | 114.7(7) |
| N6 - C01G - O5     | 124.9(7) |
| N6 - C01G - C01E   | 120.4(7) |
| N17 - C01O - C01Q  | 110.7(7) |
| N17 - C01O - C01P  | 117.7(8) |
| C01Q - C01O - C01P | 131.6(8) |
| N11 - C01I - C01N  | 121.7(7) |
| N14 - C01I - N11   | 130.6(8) |
| N14 - C01I - C01N  | 107.7(7) |
| N1 - C01K - C01M   | 121.9(7) |
| N4 - C01K - N1     | 129.7(7) |
| N4 - C01K - C01M   | 108.4(6) |
| N8 - C01J - N9     | 131.0(7) |
| N8 - C01J - C01E   | 108.9(7) |
| N9 - C01J - C01E   | 120.1(7) |
| H10A - O10W - H10B | 109.5    |
| H12A - O12W - H12B | 109.5    |
| H8WA - O8W - H8WB  | 109.5    |

---



Table 5. Detonation property values comparison with methods in this work, EXPLO5\_V6.01, and literature values.

| Compound                                                                | Density<br>(g/cm <sup>3</sup> ) | Q (kcal/g)                                              | P (GPa)                                                    | D (m/s)                                                 |
|-------------------------------------------------------------------------|---------------------------------|---------------------------------------------------------|------------------------------------------------------------|---------------------------------------------------------|
| <b>2</b>                                                                | 1.937                           | 1.21 <sup>a</sup> /1.21 <sup>b</sup>                    | 28.99 <sup>a</sup> /31.30 <sup>b</sup>                     | 7913 <sup>a</sup> /8006 <sup>b</sup>                    |
| <b>TNT<sup>1</sup></b>                                                  | 1.654                           | 1.44 <sup>a</sup> /1.30 <sup>b</sup> /1.22 <sup>c</sup> | 21.95 <sup>a</sup> /22.75 <sup>b</sup> /20.50 <sup>c</sup> | 7220 <sup>a</sup> /7465 <sup>b</sup> /7178 <sup>c</sup> |
| <b>HMX<sup>1</sup></b>                                                  | 1.910                           | 1.62 <sup>a</sup> /1.49 <sup>b</sup> /1.32 <sup>c</sup> | 40.36 <sup>a</sup> /41.25 <sup>b</sup> /38.39 <sup>c</sup> | 9374 <sup>a</sup> /9310 <sup>b</sup> /8900 <sup>c</sup> |
| <b>RDX<sup>1</sup></b>                                                  | 1.806                           | 1.59 <sup>a</sup> /1.46 <sup>b</sup> /1.44 <sup>c</sup> | 35.77 <sup>a</sup> /36.6b/33.92 <sup>c</sup>               | 8971 <sup>a</sup> /8937 <sup>b</sup> /8600 <sup>c</sup> |
| <b>[Cu(tztr)]<sub>n</sub><sup>2</sup></b>                               | 2.216                           | 2.78 <sup>a</sup> /3.40 <sup>b,c</sup>                  | 31.15 <sup>a</sup> /40.02 <sup>b,c</sup>                   | 7909 <sup>a</sup> /8429 <sup>b,c</sup>                  |
| <b>{[Cu(tztr)] H<sub>2</sub>O }<sup>3</sup></b>                         | 2.316                           | 1.32 <sup>a</sup> /1.79 <sup>b</sup> /1.32 <sup>c</sup> | 26.80 <sup>a</sup> /39.15 <sup>b</sup> /31.99 <sup>c</sup> | 7254 <sup>a</sup> /8406 <sup>b</sup> /7920 <sup>c</sup> |
| <b>[Pb(Htztr)<sub>2</sub>(H<sub>2</sub>O)]<sub>n</sub><sup>4</sup></b>  | 2.519                           | 1.73 <sup>a</sup> /0.47 <sup>b</sup> /1.36 <sup>c</sup> | 20.11 <sup>a</sup> /17.15 <sup>b</sup> /31.57 <sup>c</sup> | 6432 <sup>a</sup> /5755 <sup>b</sup> /7715 <sup>c</sup> |
| <b>[Cu(ntz)]<sub>n</sub><sup>5</sup></b>                                | 2.428                           | 1.82 <sup>a</sup> /1.47 <sup>b,c</sup>                  | 31.07 <sup>a</sup> /33.10 <sup>b,c</sup>                   | 7721 <sup>a</sup> /7970 <sup>b,c</sup>                  |
| <b>[Cu(ntz)(N<sub>3</sub>)(<sup>A</sup>MF)]<sub>n</sub><sup>5</sup></b> | 1.801                           | 1.99 <sup>a</sup> /1.81 <sup>b,c</sup>                  | 23.29 <sup>a</sup> /16.04 <sup>b,c</sup>                   | 7245 <sup>a</sup> /6080 <sup>b,c</sup>                  |
| <b>[Cu(ntz)(N<sub>3</sub>)(H<sub>2</sub>O)]<sub>n</sub><sup>5</sup></b> | 2.218                           | 0.09 <sup>a</sup> /0.02 <sup>b,c</sup>                  | 7.75 <sup>a</sup> /4.46 <sup>b,c</sup>                     | 3943 <sup>a</sup> /2220 <sup>b,c</sup>                  |

<sup>a</sup> calculation method in this work. <sup>b</sup> calculated with EXPLO5\_V6.01<sup>6</sup>. <sup>c</sup> literature values.

## REFERENCES

- 1 C. Shen, P. Wang, and M. Lu, *J. Phys. Chem. A*, 2015, 119 (29), 8250-8255.
- 2 Y. Zhang, S. Zhang, L. Sun, Q. Yang, J. Han, Q. Wei, G. Xie, S. Chen, and S. Gao, *Chem. Commun.*, 2017, 53, 3034-3037.
- 3 X. Liu, W. Gao, P. Sun, Z. Su, S. Chen, Q. Wei, G. Xie, and S. Gao, *Green Chem.*, 2015, 17, 831-836.
- 4 W. Gao, X. Liu, Z. Su, S. Zhang, Q. Yang, Q. Wei, S. Chen, G. Xie, X. Yanga, and S. Gao, *J. Mater. Chem. A*, 2014, 2, 11958-11965.
- 5 X. Qu, L. Zhai, B. Wang, Q. Wei, G. Xie, S. Chen, and S. Gao, *Dalton Trans.*, 2016, 45, 17304-17311.
- 6 M. Sućeska, *EXPLO5 6.01*, Brodarski Institute, Zagreb, Croatia, 2013
